# Supplementary material for: Vanadium nanobelts coated nickel foam 3D bifunctional electrode with excellent catalytic activity and stability for water electrolysis
Source: Royal Society of Chemistry journal article supplement (doi:10.1039/c6nr02395a), 2016-01-01
Supplement: c6nr02395a1.pdf [file c6nr02395a1.pdf]

## Supporting Information

### **Vanadium Nanobelts Coating Nickel Foam 3D Bifunctional Electrode with Excellent Catalytic Activity and Stability for Water Electrolysis**

*Yu Yu,<sup>a</sup> Pei Li,<sup>a</sup> Xiaofang Wang,<sup>a</sup> Wenyu Gao,<sup>a</sup> Zongxu Shen,<sup>a</sup> Yanan Zhu,<sup>b</sup> Shuliang Yang,<sup>b</sup> Weiguo Song,<sup>\*b</sup> and Kejian Ding<sup>\*a</sup>*

*<sup>a</sup> School of Sciences, Beijing Jiaotong University, Beijing, 100044, P. R. China,  
E-mail: dkjian@bjtu.edu.cn*

*<sup>b</sup> Institute of Chemistry, Chinese Academy of Sciences, Beijing, 10009, P. R. China  
E-mail: wsong@iccas.ac.cn*

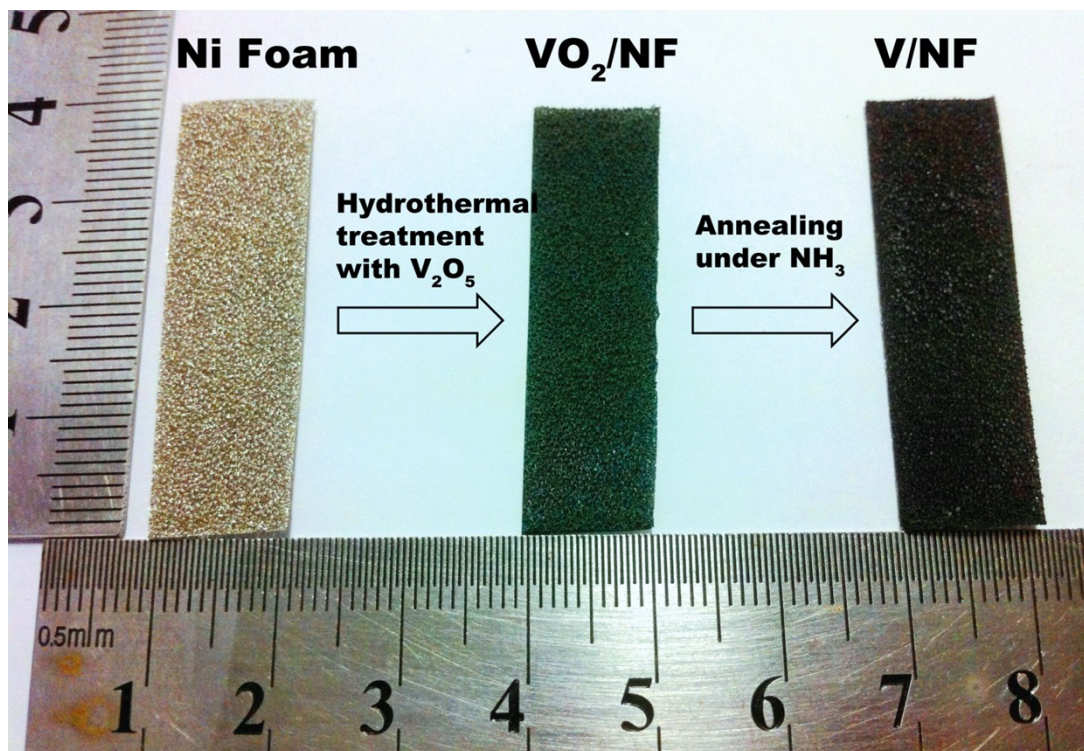

**Figure S1.** Optical photographs of raw NF, VO<sub>2</sub>/NF precursor, and the final V/NF product.

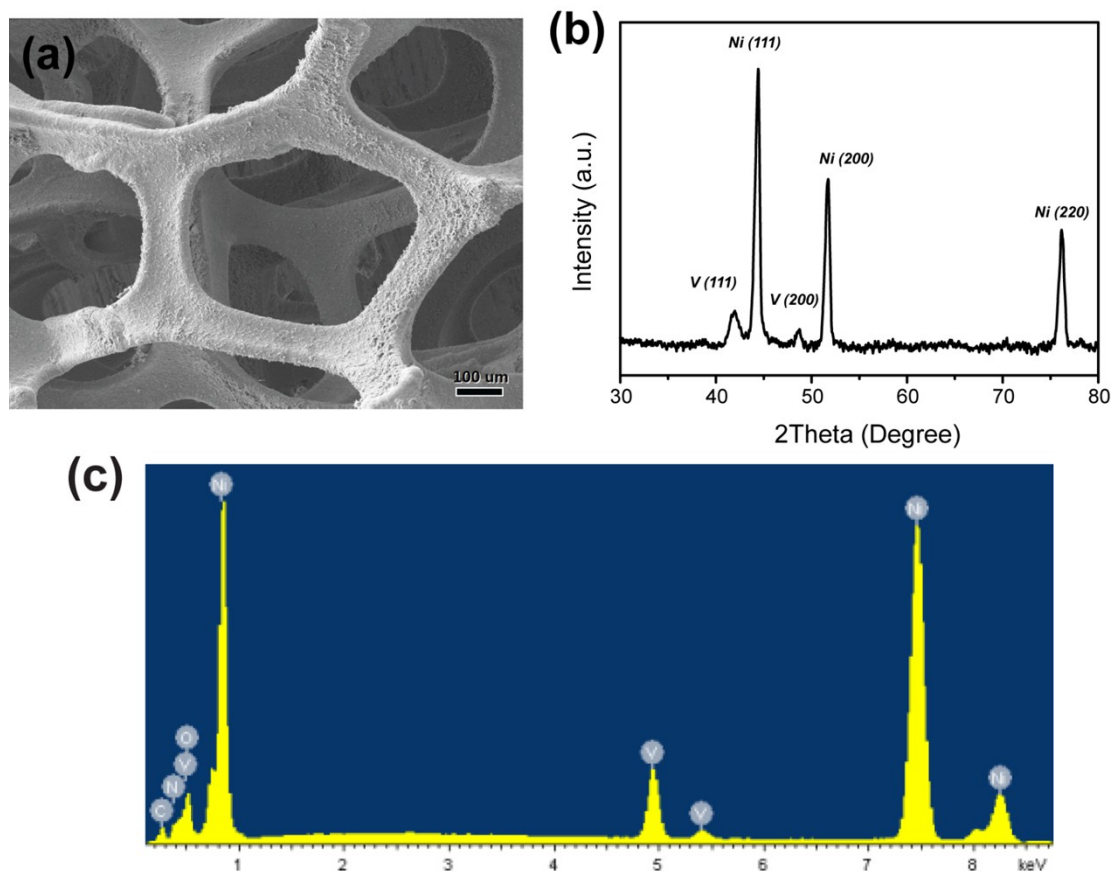

**Figure S2.** (a) The large-scale SEM image, (b) expanded XRD pattern and (c) EDS spectrum of V/NF.

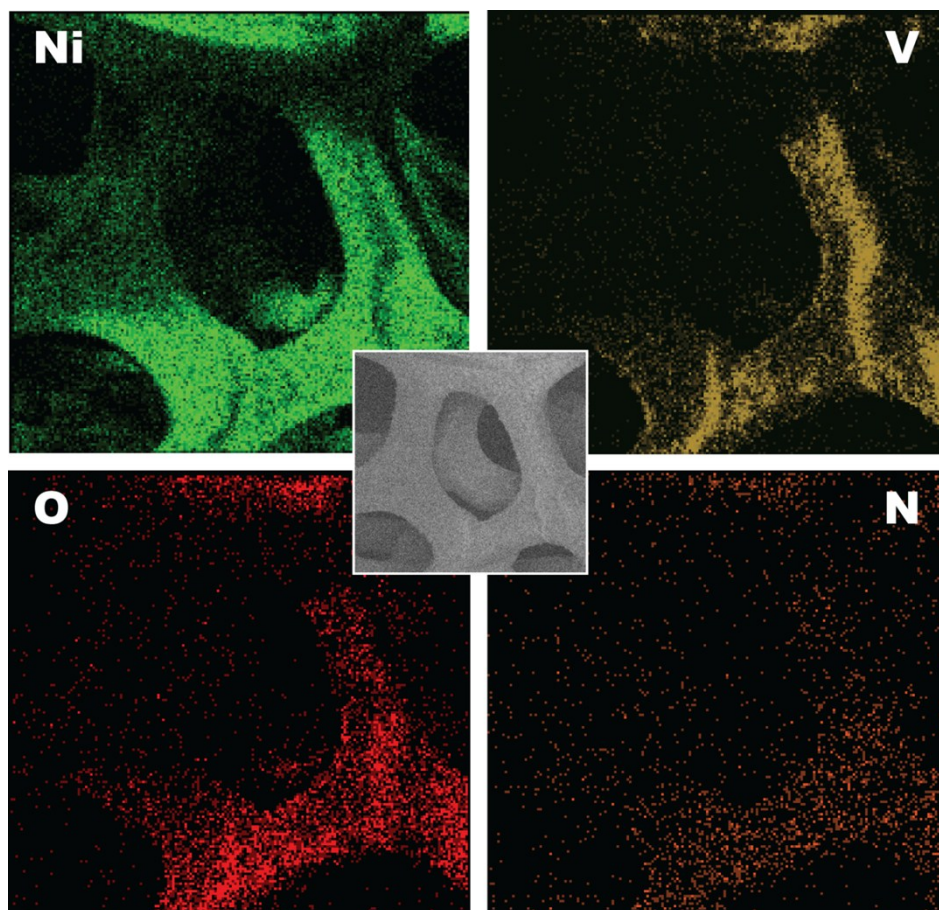

**Figure S3.** The elements distribution mapping images of V/NF.

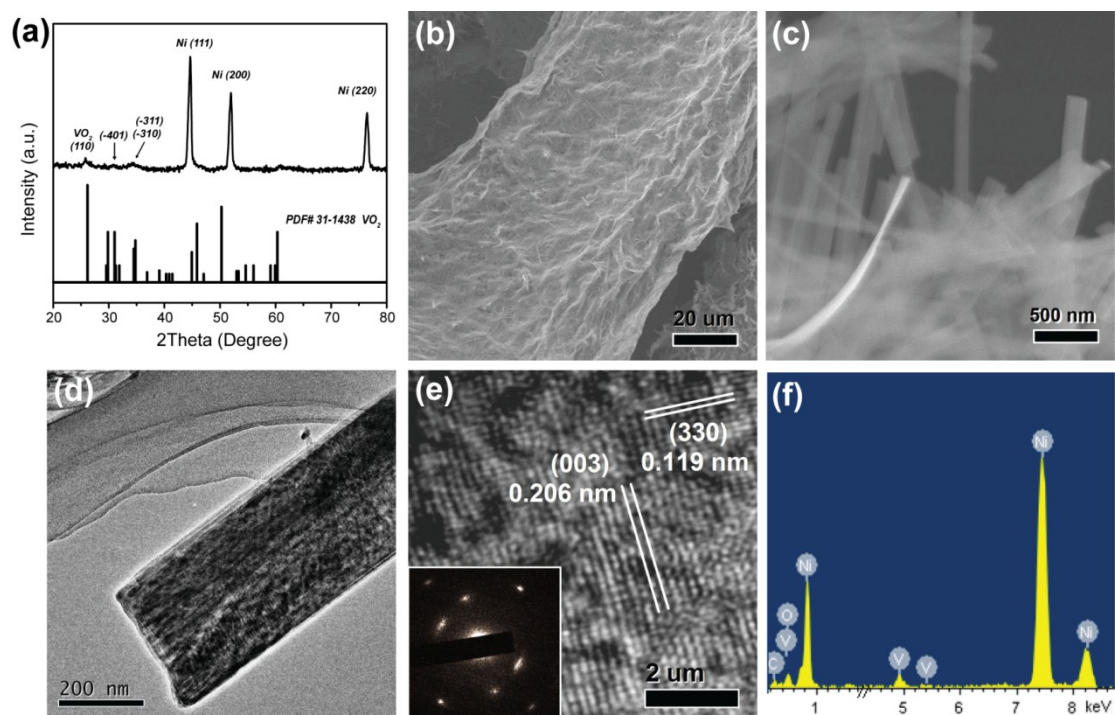

**Figure S4.** (a) XRD pattern, (b) low- and (c) high-resolution SEM images, and (f) EDS spectrum of VO<sub>2</sub>/NF precursor, (d) low- and (e) high-resolution TEM images (SAED pattern shown in the inset) of VO<sub>2</sub> nanobelt.

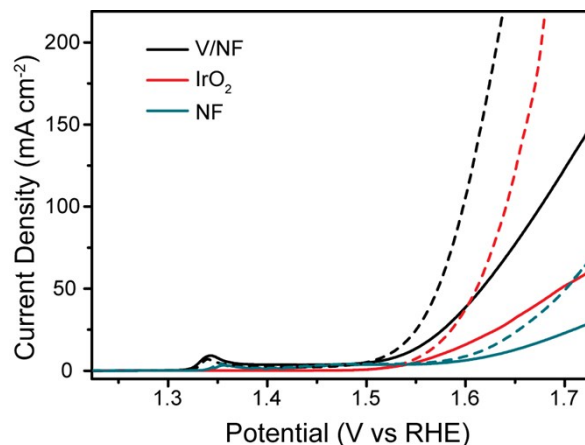

**Figure S5.** LSV curves for OER of V/NF (black), IrO<sub>2</sub> (red), bare NF (green) at a scan rate of 2 mV s<sup>-1</sup>. The solid and dash lines present the original and *iR*-corrected curves respectively.

**Table S1.** The comparison of OER performance among V/NF and the reported highly active electrocatalysts

| <i>Materials</i>                                                                                                             | <i>Overpotentials (mV) at 10 mA cm<sup>-2</sup></i> | <i>Loading density (mg cm<sup>-2</sup>)</i> | <i>Electrode substrate</i> | <i>Ref</i> |
|------------------------------------------------------------------------------------------------------------------------------|-----------------------------------------------------|---------------------------------------------|----------------------------|------------|
| Co <sub>3</sub> O <sub>4</sub> /N-rmGO                                                                                       | 310                                                 | 1                                           | Ni foam                    | [37]       |
| Ni-NiO/N-rGO                                                                                                                 | 240                                                 | 0.21                                        | Glass carbon (GCE)         | [38]       |
| Co <sub>3</sub> O <sub>4</sub> /Carbon                                                                                       | 290                                                 | 0.2                                         | Cu foil                    | [39]       |
| Mn <sub>3</sub> O <sub>4</sub> /CoSe <sub>2</sub>                                                                            | 450                                                 | 0.2                                         | GCE                        | [40]       |
| LiCoO <sub>2</sub>                                                                                                           | ~330                                                | 0.25                                        | GCE                        | [41]       |
| SrNb <sub>0.1</sub> Co <sub>0.7</sub> Fe <sub>0.2</sub> O <sub>3-δ</sub>                                                     | 420                                                 | 0.464                                       | GCE                        | [43]       |
| La <sub>0.3</sub> (Ba <sub>0.5</sub> Sr <sub>0.5</sub> ) <sub>0.7</sub> Co <sub>0.8</sub> Fe <sub>0.2</sub> O <sub>3-δ</sub> | ~600                                                | 0.693                                       | GCE                        | [44]       |
| Fe <sub>6</sub> Ni <sub>10</sub> O <sub>x</sub>                                                                              | 286                                                 | 0.1                                         | GCE                        | [45]       |
| NiFe layered double hydroxides (LDH)                                                                                         | 240                                                 | Not given                                   | Ni foam                    | [46]       |
| NiFe-LDH/CNT                                                                                                                 | 248                                                 | 0.2                                         | Carbon fiber               | [47]       |
| CoMn LDH                                                                                                                     | 293                                                 | 0.142                                       | GCE                        | [49]       |
| FeNi-rGO LDH                                                                                                                 | 207                                                 | 0.25                                        | Ni foam                    | [50]       |
| N doped NiFe LDH                                                                                                             | 230                                                 | 0.7                                         | GCE                        | [51]       |
| Vanadium nanobelts                                                                                                           | 292                                                 | 0.28                                        | Ni foam                    | This work  |

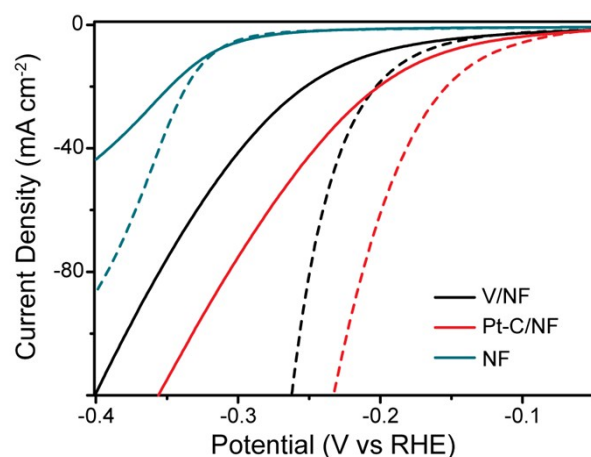

**Figure S6.** LSV curves for HER of V/NF (black), Pt-C/NF (red), bare NF (green) at a scan rate of  $2 \text{ mV s}^{-1}$ . The solid and dash lines present the original and  $iR$ -corrected curves respectively.

**Table S2.** The comparison of HER performance among V/NF and the reported highly active electrocatalysts

| <i>Materials</i>                                                | <i>Overpotentials (mV) at -10 mA cm<sup>-2</sup></i> | <i>Loading density (mg cm<sup>-2</sup>)</i> | <i>Electrode substrate</i> | <i>Ref</i> |
|-----------------------------------------------------------------|------------------------------------------------------|---------------------------------------------|----------------------------|------------|
| WS <sub>2</sub> /rGO                                            | ~280                                                 | 0.4                                         | GCE                        | [9]        |
| MoS <sub>2</sub> /rGO                                           | ~180                                                 | 1                                           | Carbon fiber               | [10]       |
| Ni/NiO/CoSe <sub>2</sub>                                        | ~90                                                  | 0.28                                        | GCE                        | [11]       |
| CoSe <sub>2</sub>                                               | 139                                                  | 2.8                                         | Carbon fiber               | [12]       |
| Amorphous MoS <sub>x</sub> Cl <sub>y</sub> on vertical graphene | 175                                                  | -                                           | Graphite disk              | [14]       |
| Fe <sub>0.43</sub> Co <sub>0.57</sub> S <sub>2</sub>            | ~190                                                 | 0.037                                       | GCE                        | [15]       |
| NiSe nanofiber                                                  | 280                                                  | 0.28                                        | GCE                        | [16]       |
| Layered MoS <sub>2</sub>                                        | 149                                                  | 0.28                                        | GCE                        | [17]       |
| MoS <sub>2</sub> /CoSe <sub>2</sub>                             | 68                                                   | 0.28                                        | GCE                        | [18]       |
| CoSe <sub>2</sub> nanobelts                                     | 141                                                  | 4.3                                         | Carbon fiber               | [19]       |
| WS <sub>2</sub> @P,N,O-graphene                                 | 125                                                  | 0.113                                       | None                       | [20]       |

|                                                               |                                                                  |            |              |            |
|---------------------------------------------------------------|------------------------------------------------------------------|------------|--------------|------------|
| MoS <sub>x</sub> @N-graphene                                  | 141                                                              | 0.7        | None         | [21]       |
| CoP nanoparticle                                              | 95 for -20 mA cm <sup>-2</sup><br>85 for -20 mA cm <sup>-2</sup> | 0.9<br>2   | Ti foil      | [22]       |
| CoP/CNT                                                       | 122                                                              | 0.285      | GCE          | [23]       |
| CoP nanowire                                                  | 67                                                               | 0.92       | Carbon fiber | [24]       |
| Ni <sub>2</sub> P                                             | 130 for -20 mA cm <sup>-2</sup>                                  | ~1         | Ti foil      | [25]       |
| FeP Nanowire                                                  | 55                                                               | 3.2        | Ti plate     | [26]       |
| MoP                                                           | 246                                                              | 0.071      | GCE          | [27]       |
| Molybdenum Phosphosulfide                                     | 117                                                              | 1          | Ti foil      | [28]       |
| Co <sub>0.6</sub> Mo <sub>1.4</sub> N <sub>2</sub>            | 200                                                              | 0.24       | GCE          | [29]*      |
| NiMoN <sub>x</sub> /Carbon                                    | ~220 for -5 mA cm <sup>-2</sup>                                  | 0.25       | GCE          | [30]*      |
| Mo <sub>2</sub> C nanowire                                    | ~125                                                             | 0.21       | GCE          | [31]       |
| MoB                                                           | ~212 in 1 M H <sub>2</sub> SO <sub>4</sub><br>~220 in 1 M KOH    | 2.5<br>2.3 | Carbon paste | [34]       |
| Mo <sub>2</sub> C                                             | ~210 in 1 M H <sub>2</sub> SO <sub>4</sub><br>~190 in 1 M KOH    | 1.4<br>0.8 | Carbon paste | [34]       |
| g-C <sub>3</sub> N <sub>4</sub> @nitrogen-doped graphene      | 240                                                              | 0.1        | GCE          | [33]       |
| N,G-graphene                                                  | 420                                                              | 0.2        | GCE          | [36]       |
| porous C <sub>3</sub> N <sub>4</sub> @nitrogen-doped graphene | 80                                                               | Not given  | None         | [36]       |
| Vanadium nanobelts                                            | 176                                                              | 0.28       | Ni foam      | This work* |

\*The electrolyte was 0.1 M HClO<sub>4</sub> in ref [23], [24], 1 M KOH in this work, and 0.5 M H<sub>2</sub>SO<sub>4</sub> in other unmarked cases.

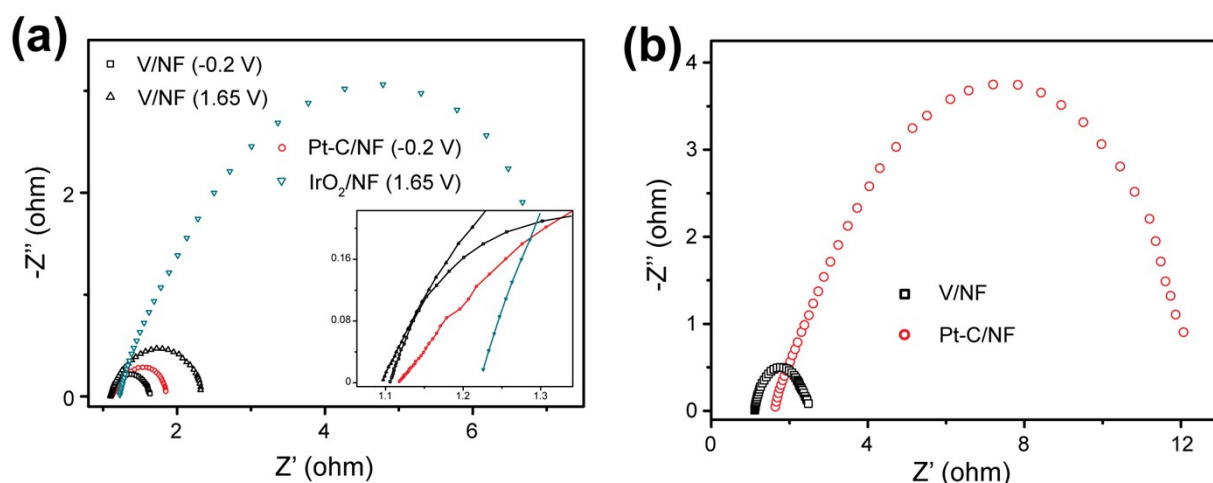

**Figure S7.** (a) Electrochemical impedance spectra (EIS) of V/NF (at -0.2 and 1.65 V vs RHE), Pt-C/NF (at -0.2 V vs RHE), and IrO<sub>2</sub>/NF (at 1.65 V vs RHE) in the three electrode system, the inset shows the amplification of high frequency region; (b) EIS of V/NF and Pt-C/NF in two electrode system with the same materials as both electrodes.

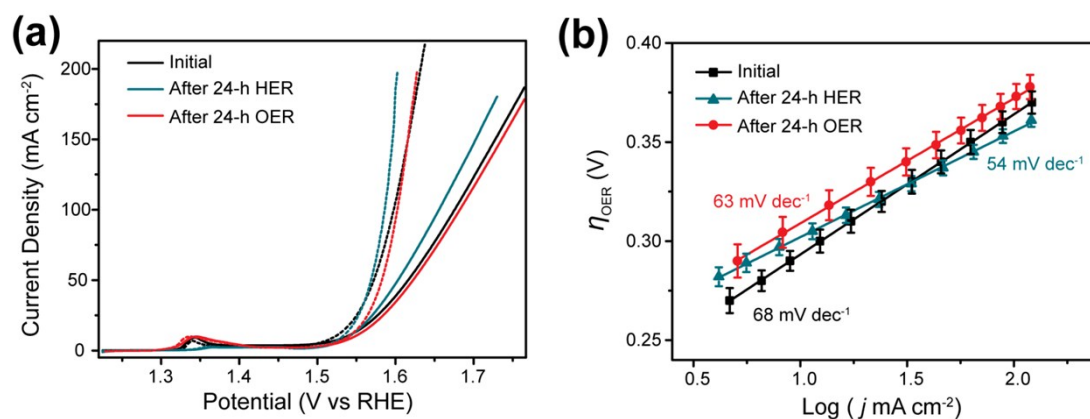

**Figure S8.** (a) LSV curves for OER of fresh V/NF (black), V/NF after 24-h HER (green), V/NF after 24-h OER (red) at a scan rate of 2 mV s<sup>-1</sup>. The solid and dash lines present the original and  $iR$ -corrected polarization curves respectively. (b) The corresponding Tafel plots of the three samples.

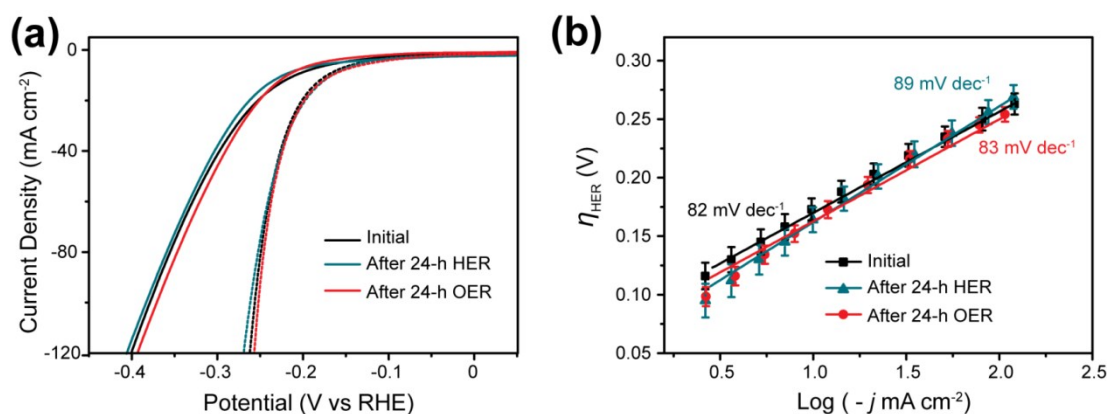

**Figure S9.** (a) LSV curves for HER of fresh V/NF (black), V/NF after 24-h HER (green), V/NF after 24-h OER (red) at a scan rate of  $2 \text{ mV s}^{-1}$ . The solid and dash lines present the original and  $iR$ -corrected polarization curves respectively. (b) The corresponding Tafel plots of the three samples.

**Table S3.** The comparison of water electrolysis performance among V/NF and the reported highly active electrocatalysts

| Materials                                 | Applied potentials (V)     |                            | Loading density<br>( $\text{mg cm}^{-2}$ ) | Electrode<br>substrate | Ref       |
|-------------------------------------------|----------------------------|----------------------------|--------------------------------------------|------------------------|-----------|
|                                           | at $10 \text{ mA cm}^{-2}$ | at $20 \text{ mA cm}^{-2}$ |                                            |                        |           |
| NiFe layered double hydroxide             | 1.70                       | ~1.74                      | unknown                                    | Ni foam                | [12a]     |
| NiSe nanowire                             | 1.63                       | ~1.72                      | 2.8                                        | Ni foam                | [17]      |
| NiCo <sub>2</sub> S <sub>4</sub> nanowire | 1.68                       | ~1.83                      | 4                                          | Carbon cloth           | [18]      |
| Co-P films                                | 1.65                       | ~1.67                      | 2.71                                       | Cu foil                | [20]      |
| Vanadium nanobelts                        | 1.74                       | 1.80                       | 0.28                                       | Ni foam                | This work |



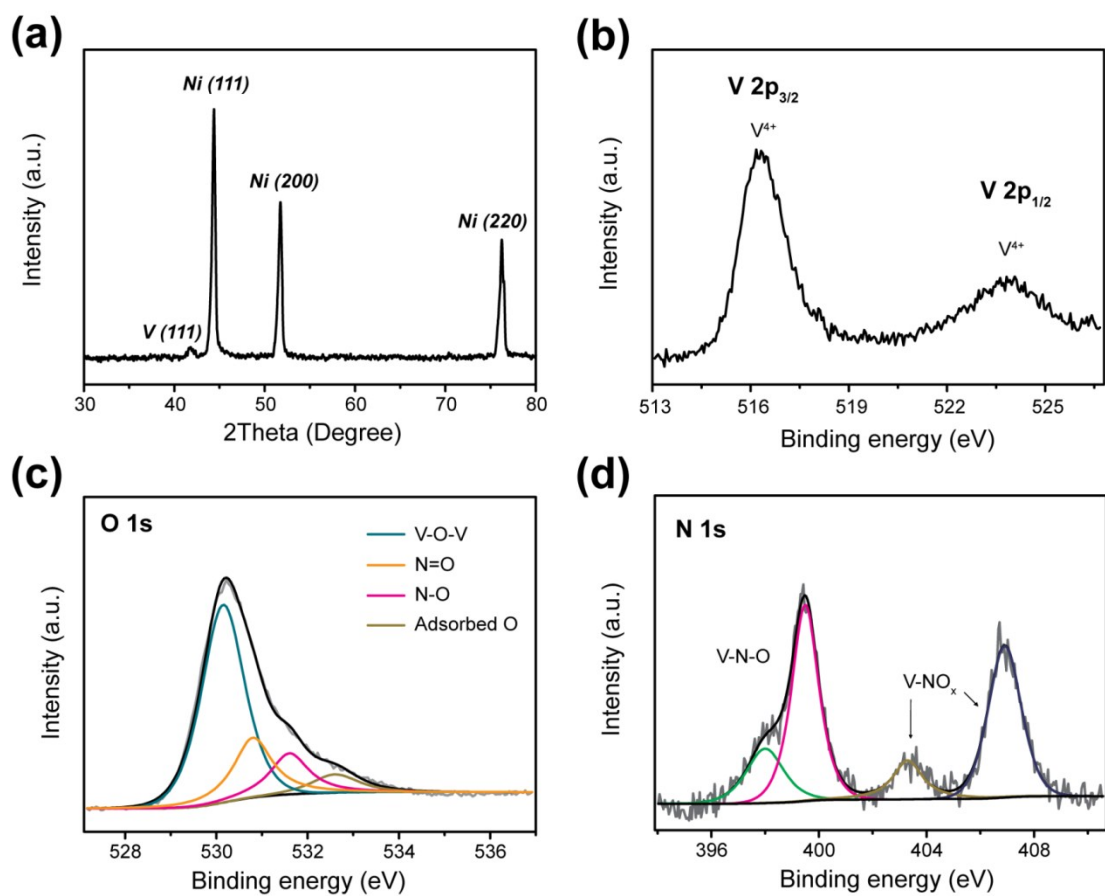

**Figure S10.** (a) XRD pattern of V/NF, (b) V 2p, (c) O 1s, and (d) N 1s XPS spectra of vanadium nanobelts in V/NF after 24-h OER.

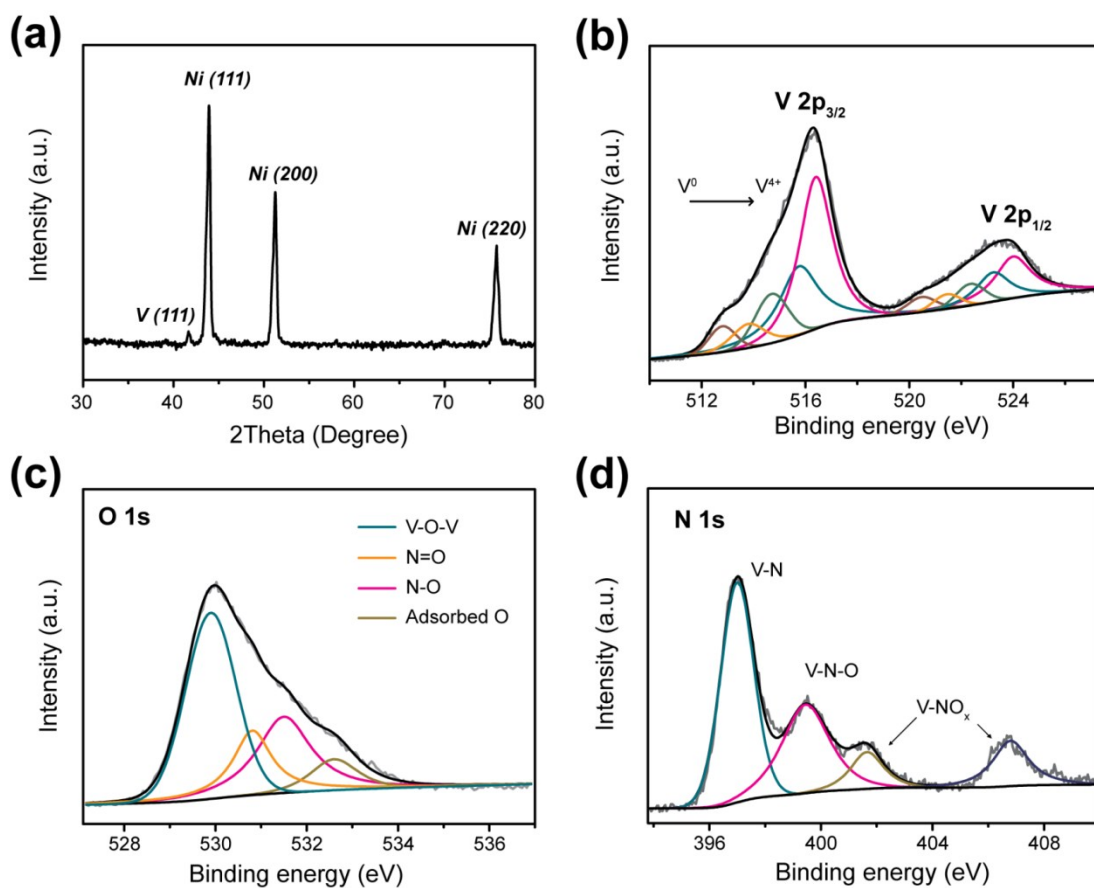

**Figure S11.** (a) XRD pattern of V/NF, (b) V 2p, (c) O 1s, and (d) N 1s XPS spectra of vanadium nanobelts in V/NF after 24-h HER.

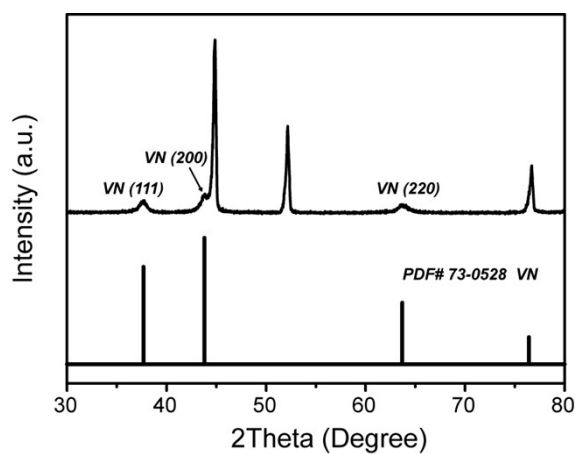

**Figure S12.** (a) XRD pattern of VN/NF.

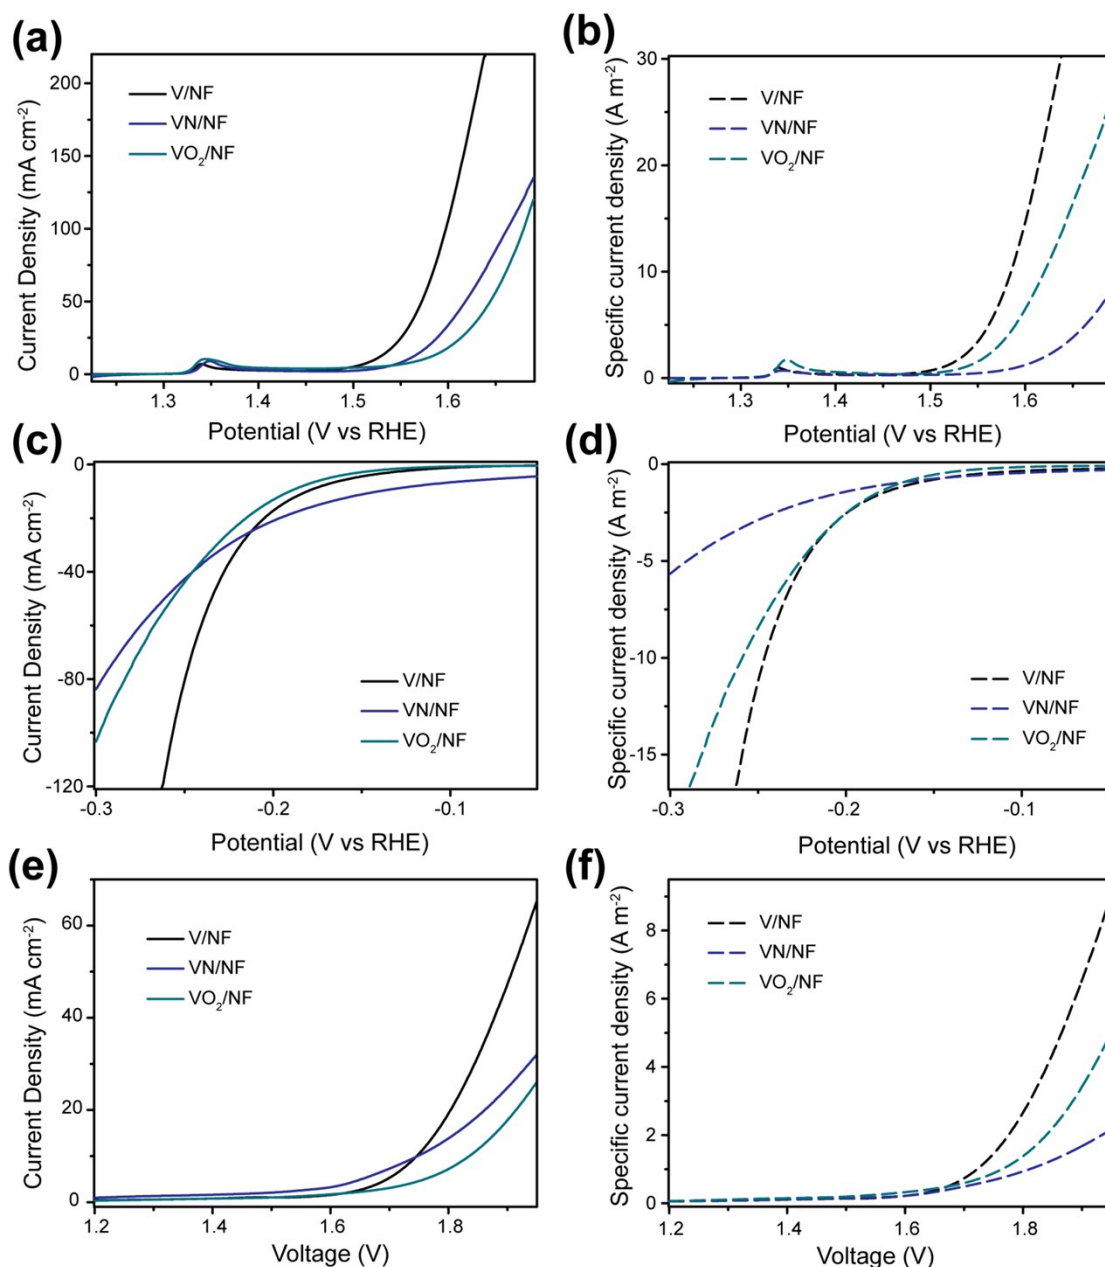

**Figure S13.** (a) *iR*-corrected OER polarization curves, (b) OER polarization curves, (c) LSV curves without *iR*-correction of water electrolysis form V/NF, VO<sub>2</sub>/NF, and VN/NF electrodes.
